# Supplementary material for: Neuroimaging insights into default mode network alterations following dexmedetomidine-controlled sleep in insomnia patient comorbid with depression
Source: Research Square preprint supplement (doi:10.21203/rs.3.rs-7620820/v1), 2025-12-01
Supplement: Supplementary file 1 [file cabfffdf1707c79a770fd2a6.docx]

The detailed imaging parameters are as follows:

Routine sequences included T1-weighted imaging, T2-weighted imaging, and T2-FLAIR imaging. Whole-brain blood-oxygen-level-dependent (BOLD) images were acquired using a standard gradient-echo echo-planar imaging sequence with the following settings: repetition time (TR) = 1000 ms, echo time (TE) = 30 ms, acquisition matrix = 68 × 70, matrix size = 3 × 3 mm, flip angle = 90°, field of view (FOV) = 208 × 208 mm, slice thickness = 4.0 mm, number of slices = 36, voxel size = 3 × 3 × 4mm³, and number of volumes = 240.

Brain volumes calculation method as follows:

In this study, the statistical parametric mapping analysis software package 12 (SPM12, version 7771) was run in the MATLAB R2018b environment. The computational anatomy toolbox 12 (CAT12; http://www.neuro.unijena.de/ cat) performed brain volumes analysis on 3D-T1 weighted images. Using the standard protocol, default parameter settings were applied for image preprocessing. Magnetic resonance images in DICOM format were converted to Nii format. Image quality was ensured through visual inspection to check for motion artifacts or other distortions, and corrections were made using the midpoint of the trailing edge to the posterior joint line as the baseline. The longitudinal data preprocessing mode in CAT12 was used to re-align initial images of the same subject at two time points, with intra-subject bias correction performed. Affine normalization based on the East Asian brain template, noise reduction, and intensity inhomogeneity correction were applied. Finally, the images were segmented into gray matter, white matter, and cerebrospinal fluid. Spatial normalization: Segmented images were normalized and registered to the standard space of the Montreal Neurological Institute (MNI) (3) Parameter processing: Brain volume parameters were extracted to obtain total intracranial volume (TIV), gray matter volume (GM), and cerebral white matter lesion volume (WMH).

The specific scoring method for the Medication Load Index (MLI) is as follows.

To control for the potential confounding effects of antidepressant use during DeX-PCSL treatment, a Medication Load Index (MLI) was calculated for each participant. The MLI was based on three components: drug type, dosage, and duration of use. Each antidepressant class (e.g., SSRIs, SNRIs, NaSSAs, TCAs) was assigned 1 point. Dosage levels were scored as low (1 point), medium (2 points), or high (3 points) based on standard clinical ranges. Duration of use was scored as 0 (no use), 1 (<1 month), or 2 (≥1 month). For participants receiving multiple antidepressants, scores were summed across all medications to yield the total MLI. The final MLI score was treated as a continuous covariate in statistical analyses and used for covariate adjustment or subgroup comparisons, allowing for a more accurate assessment of the independent effects of DeX-PCSL on sleep, mood, and neuroimaging outcomes.
